# Supplementary material
Source: MDPI journal article supplement (https://www.mdpi.com/2073-4352/12/1/6)
Supplement: s1 [file s1]

## Article

# Synthesis of Unexpected Dimethyl 2-(4-Chlorophenyl)-2,3-Dihydropyrrolo[2,1-*a*]Isoquinoline-1,3-Dicarboxylate via Hydrolysis/Cycloaddition/Elimination Cascades: Single Crystal X-Ray and Chemical Structure Insights

Mezna Saleh Altowyan <sup>1</sup>, Saied M. Soliman <sup>2</sup>, Matti Haukka <sup>3</sup>, Nora H Al-Shaalan <sup>1</sup>, Aminah A. Alkharboush <sup>1</sup> and Assem Barakat <sup>4,\*</sup>

**Citation:** Altowyan, M.S.; Soliman, S.M.; Haukka, M.; Al-Shaalan, N.H.; Alkharboush, A.A.; Barakat, A. Synthesis of Unexpected Dimethyl 2-(4-Chlorophenyl)-2,3-Dihydropyrrolo[2,1-*a*]Isoquinoline-1,3-dicarboxylate via Hydrolysis/Cycloaddition/Elimination Cascades: Single Crystal X-Ray and Chemical Structure Insights. *Crystals* **2022**, *12*, 6. <https://doi.org/10.3390/cryst12010006>

Academic Editors: Jesús Sanmartín-Matalobos and Alexander S. Novikov

Received: 1 December 2021

Accepted: 16 December 2021

Published: 21 December 2021

**Publisher's Note:** MDPI stays neutral with regard to jurisdictional claims in published maps and institutional affiliations.

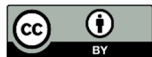

**Copyright:** © 2021 by the authors. Submitted for possible open access publication under the terms and conditions of the Creative Commons Attribution (CC BY) license (<https://creativecommons.org/licenses/by/4.0/>).

<sup>1</sup> Department of Chemistry, College of Science, Princess Nourah Bint Abdulrahman University, P.O. Box 84428, Riyadh 11671, Saudi Arabia; msaltowyan@pnu.edu.sa (M.S.A.); nhalshaalan@pnu.edu.sa (N.H.A.-S.); Amina84w@gmail.com (A.A.A.).

<sup>2</sup> Department of Chemistry, Faculty of Science, Alexandria University, P.O. Box 426, Ibrahimia, Alexandria 21321, Egypt; saied1soliman@yahoo.com & saeed.soliman@alexu.edu.eg (S.M.S.).

<sup>3</sup> Department of Chemistry, University of Jyväskylä, P.O. Box 35, FI-40014 Jyväskylä, Finland; matti.o.haukka@jyu.fi (M.H.).

<sup>4</sup> Department of Chemistry, College of Science, King Saud University, P. O. Box 2455, Riyadh 11451, Saudi Arabia

\* Correspondence: ambarakat@ksu.edu.sa; Tel.: +966-11467-5901; Fax: +966-11467-5992

## Supplementary data

### 1. X-Ray single crystal measurements of 3

The crystal of **3** was immersed in cryo-oil, mounted in a loop, and measured at a temperature of 120 K. The X-ray diffraction data was collected on a Rigaku Oxford Diffraction Supernova diffractometer using Mo  $K\alpha$  radiation. The *CrysAlisPro* [1] software package was used for cell refinement and data reduction. A multi-scan absorption correction (*CrysAlisPro* [1]) was applied to the intensities before structure solution. The structure was solved by intrinsic phasing (*SHELXT* [2]) method. Structural refinement was carried out using *SHELXL* [3] software with *SHELXLE* [4] graphical user interface. Hydrogen atoms were positioned geometrically and constrained to ride on their parent atoms, with  $C-H = 0.95-1.00$  Å and  $U_{iso} = 1.2-1.5 \cdot U_{eq}(\text{parent atom})$ .

### 2. Hirshfeld surface analysis

The topology analyses were performed using Crystal Explorer 17.5 program [5].

### 3. Computational methods

All DFT calculations were performed using Gaussian 09 software package [6] utilizing B3LYP/6-31G(d,p) method. Natural charge calculations were performed using NBO 3.1 program as implemented in the Gaussian 09W package [7]. The self-consistent reaction filed (SCRF) method [8, 9] was used to model the solvent effects when calculated the optimized geometries in solution. Then the NMR chemical shifts for the protons and carbons were computed using GIAO method [10]. Also, the UV-Vis electronic spectra of the compound were calculated using TD-DFT method.

## References

1. Rikagu Oxford Diffraction. *CrysAlisPro*; Agilent Technologies inc.: Yarnton, Oxfordshire, UK, 2018.
2. Sheldrick, G. M. ShelXT-Integrated space-group and crystal-structure determination. *Acta Cryst.* **2015**, A71, 3–8.
3. Sheldrick, G.M. SHELXT-Integrated space-group and crystal-structure determination. *Acta Cryst.* **2015**, C71, 3–8.
4. Hübschle, C.B.; Sheldrick, G.M.; Dittrich, B. ShelXle: A Qt graphical user interface for SHELXL. *J. Appl. Cryst.* **2011**, 44, 1281–1284.
5. Turner, M. J.; McKinnon, J. J.; Wolff, S. K.; Grimwood, D. J.; Spackman, P. R.; Jayatilaka, D.; Spackman, M. A. Crystal Explorer17 (2017) University of Western Australia. <http://hirshfeldsurface.net>
6. Frisch, M.J.; Trucks, G.W.; Schlegel, H.B.; Scuseria, G.E.; Robb, M.A.; Cheeseman, J.R.; Scalmani, G.; Barone, V.; Mennucci, B.; Petersson, G.A.; et al. *GAUSSIAN 09*; Revision A02; Gaussian Inc.: Wallingford, CT, USA, 2009; *GaussView*; Version 4.1; Dennington II, R., Keith, T., Millam, J., Eds.; Semichem Inc.: Shawnee Mission, KS, USA, 2007.
7. Reed, A.E.; Curtiss, L.A.; Weinhold, F. Intermolecular interactions from a natural bond orbital, donor-acceptor viewpoint. *Chem. Rev.* **1988**, 88, 899–926.
8. Marten, B.; Kim K.; Cortis, C.; Friesner, R. A.; Murphy, R. B.; Ringnalda, M. N.; Sitkoff, D.; Honig, B. New Model for Calculation of Solvation Free Energies: Correction of Self-Consistent Reaction Field Continuum Dielectric Theory for Short-Range Hydrogen-Bonding Effects, *J. Phys. Chem.* **1996** 100 11775–11765.
9. Tannor, D.J.; Marten, B.; Murphy, R.; Friesner, R.A.; Sitkoff, D.; Nicholls, A.; Ringnalda, M.; Goddard, W.A.; Honig, B. Accurate first principles calculation of molecular charge distributions and solvation energies from ab initio quantum mechanics and continuum dielectric theory. *J. Am. Chem. Soc.* **1994**, 116, 11875–11882.
10. Cheeseman, J.R.; Trucks, G.W.; Keith, T.A.; Frisch, M.J. A Comparison of Models for Calculating Nuclear Magnetic Resonance Shielding Tensors. *J. Chem. Phys.* **1996**, 104, 5497–5509.

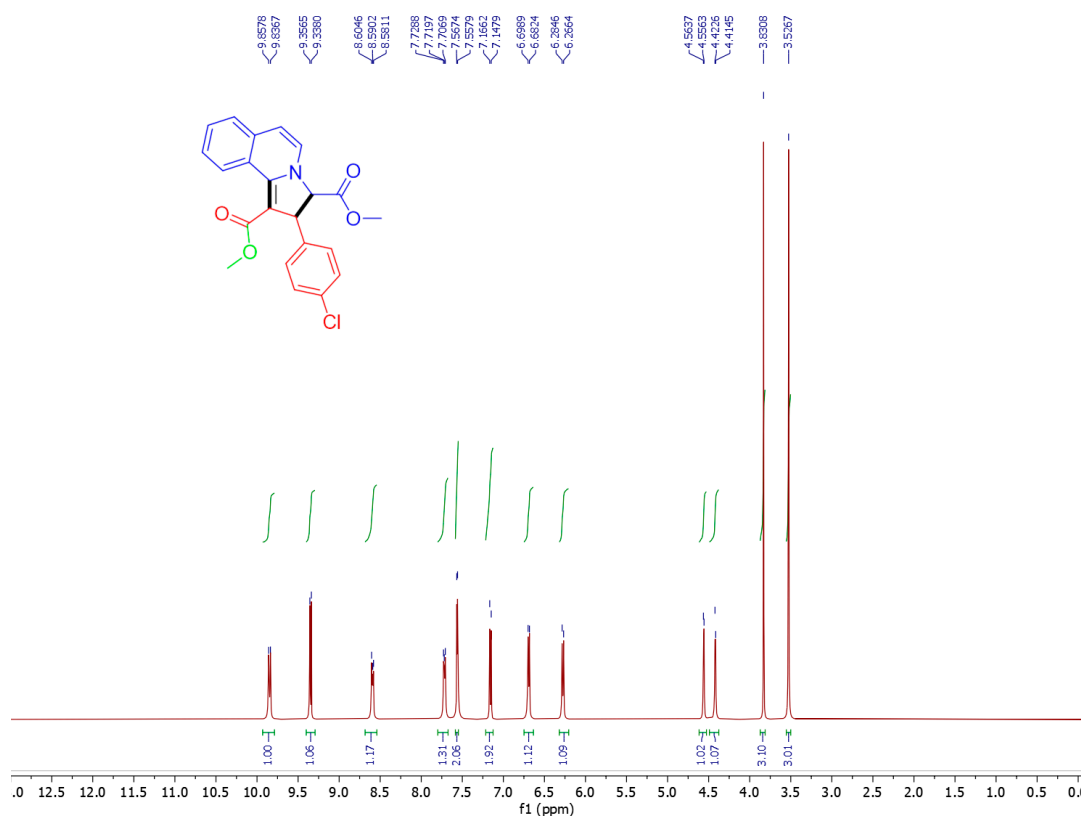

Figure S1. <sup>1</sup>H NMR spectrum for the synthesized compound 3.

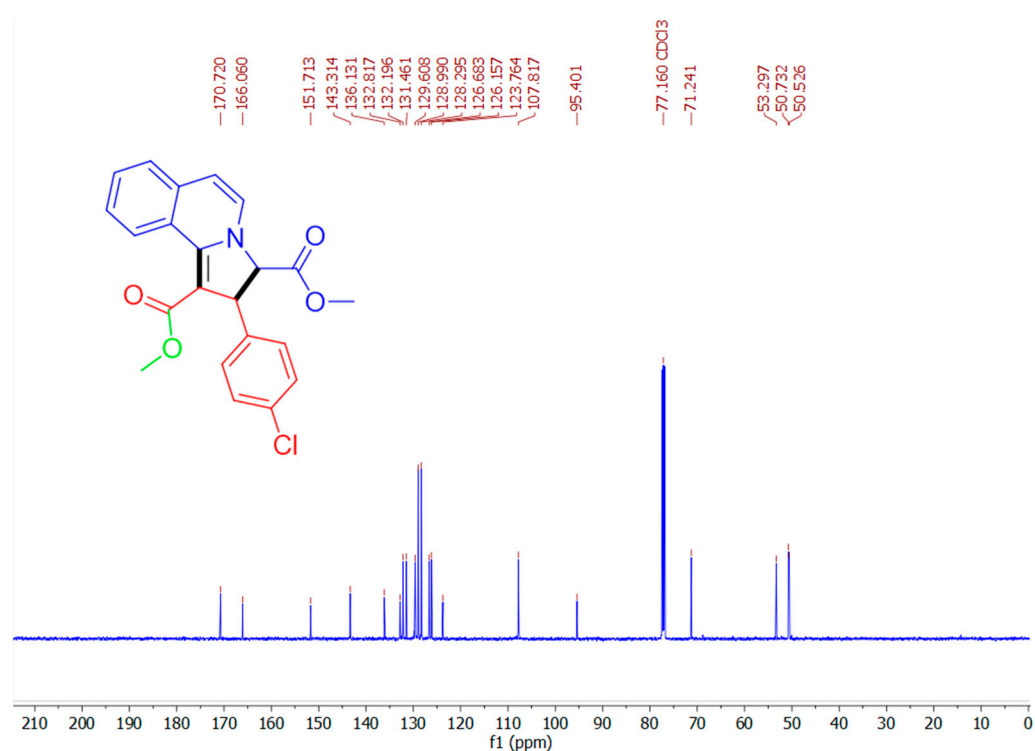

Figure S2.  $^{13}\text{C}$ -NMR spectrum for the synthesized compound 3.

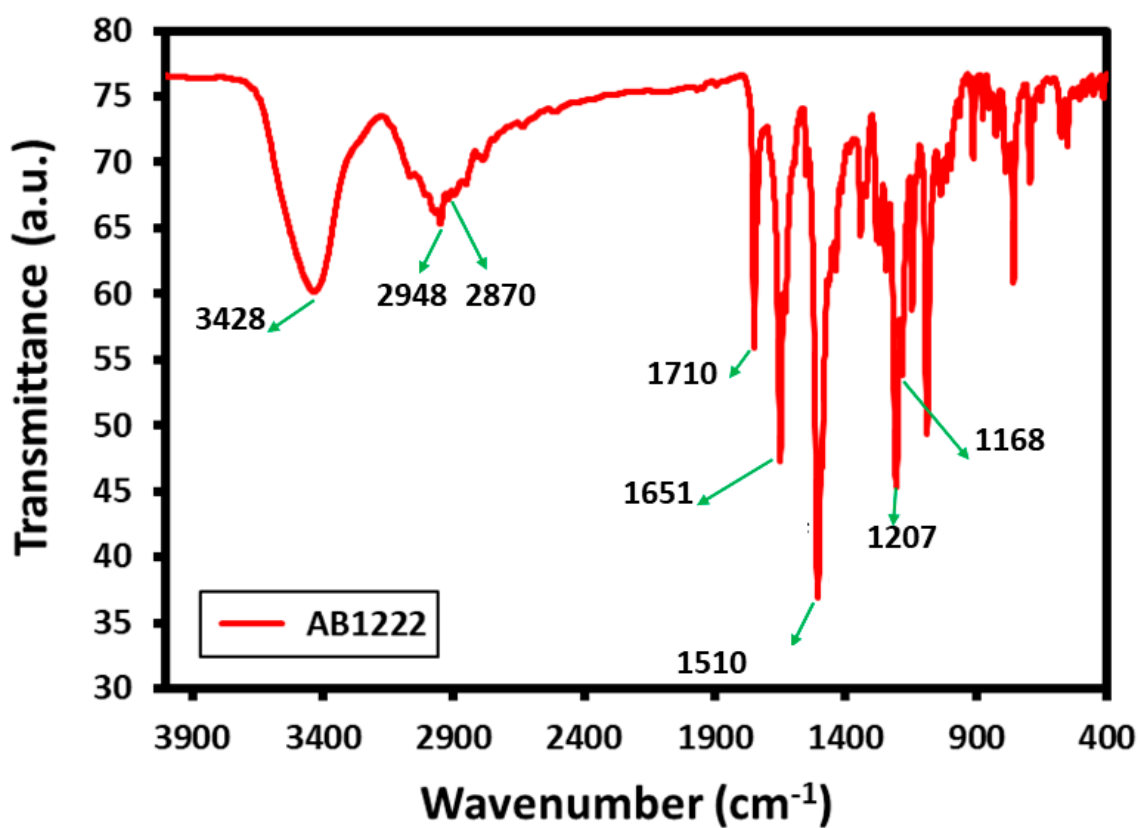

Figure S3. IR spectrum for the synthesized compound 3.

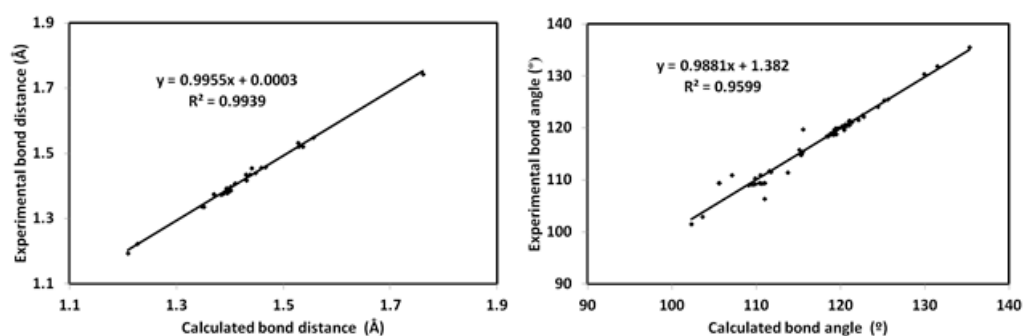

Figure S4. Correlations between the optimized and experimental geometric parameters.

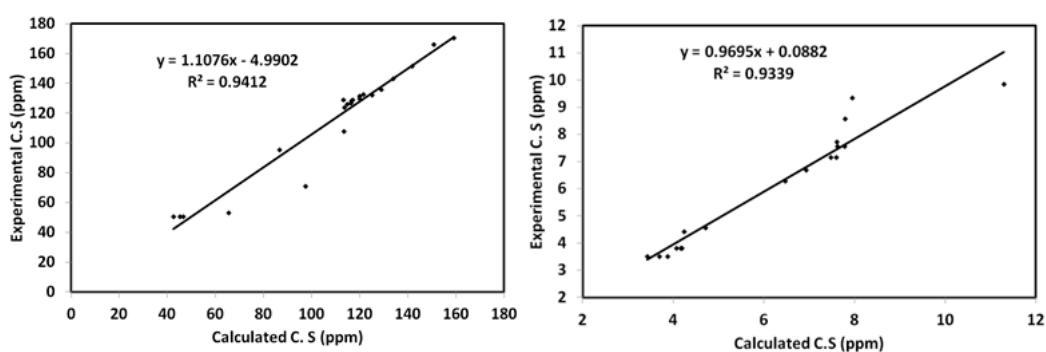

Figure S5.  $^1\text{H}$  and  $^{13}\text{C}$  NMR correlations between the calculated and experimental data.

Table S1. The calculated geometric parameters of **3**<sup>a</sup>.

| Parameter | Calc  | Exp   | Parameter  | Calc    | Exp     |
|-----------|-------|-------|------------|---------|---------|
| R(1-11)   | 1.761 | 1.743 | A(1-11-9)  | 119.549 | 119.759 |
| R(2-21)   | 1.347 | 1.338 | A(1-11-12) | 119.478 | 118.831 |
| R(2-22)   | 1.441 | 1.455 | A(21-2-22) | 115.398 | 114.87  |
| R(3-21)   | 1.209 | 1.194 | A(2-21-3)  | 124.459 | 124.117 |
| R(4-42)   | 1.372 | 1.37  | A(2-21-19) | 109.878 | 110.346 |
| R(4-43)   | 1.43  | 1.436 | A(2-22-23) | 110.381 | 109.463 |
| R(5-42)   | 1.227 | 1.223 | A(2-22-24) | 105.586 | 109.477 |
| R(6-19)   | 1.458 | 1.457 | A(2-22-25) | 110.427 | 109.487 |
| R(6-26)   | 1.37  | 1.376 | A(3-21-19) | 125.628 | 125.537 |
| R(6-40)   | 1.397 | 1.382 | A(42-4-43) | 115.091 | 115.807 |
| R(7-9)    | 1.395 | 1.387 | A(4-42-5)  | 120.205 | 120.337 |
| R(7-16)   | 1.399 | 1.39  | A(4-42-41) | 109.88  | 109.237 |
| R(9-11)   | 1.393 | 1.386 | A(4-43-44) | 111.022 | 109.46  |
| R(11-12)  | 1.394 | 1.378 | A(4-43-45) | 110.992 | 109.471 |
| R(12-14)  | 1.394 | 1.392 | A(4-43-46) | 105.605 | 109.457 |
| R(14-16)  | 1.401 | 1.387 | A(5-42-41) | 129.912 | 130.406 |
| R(16-17)  | 1.528 | 1.521 | A(42-5-38) | 110.981 | 106.378 |
| R(17-19)  | 1.556 | 1.549 | A(19-6-26) | 122.772 | 122.191 |
| R(17-41)  | 1.527 | 1.532 | A(19-6-40) | 111.755 | 111.585 |
| R(19-21)  | 1.536 | 1.522 | A(6-19-17) | 103.633 | 103.008 |
| R(26-28)  | 1.351 | 1.336 | A(6-19-20) | 110.51  | 110.913 |
| R(28-30)  | 1.438 | 1.436 | A(6-19-21) | 110.708 | 109.296 |
| R(30-31)  | 1.409 | 1.408 | A(26-6-40) | 125.161 | 125.365 |
| R(30-39)  | 1.431 | 1.418 | A(6-26-27) | 115.58  | 119.782 |

|          |       |       |             |         |         |
|----------|-------|-------|-------------|---------|---------|
| R(31-33) | 1.384 | 1.373 | A(6-26-28)  | 120.746 | 120.436 |
| R(33-35) | 1.401 | 1.398 | A(6-40-39)  | 115.517 | 115.382 |
| R(35-37) | 1.387 | 1.377 | A(6-40-41)  | 109.152 | 109.022 |
| R(37-39) | 1.41  | 1.408 | A(9-7-16)   | 121.123 | 121.361 |
| R(39-40) | 1.466 | 1.458 | A(7-9-11)   | 119.199 | 118.718 |
| R(40-41) | 1.393 | 1.393 | A(7-16-14)  | 118.386 | 118.42  |
| R(41-42) | 1.448 | 1.441 | A(7-16-17)  | 122.142 | 121.617 |
|          |       |       | A(9-11-12)  | 120.973 | 121.409 |
|          |       |       | A(11-12-14) | 118.972 | 118.859 |
|          |       |       | A(12-14-16) | 121.348 | 121.225 |
|          |       |       | A(14-16-17) | 119.426 | 119.931 |
|          |       |       | A(16-17-19) | 111.557 | 111.808 |
|          |       |       | A(16-17-41) | 115.261 | 114.88  |
|          |       |       | A(19-17-41) | 102.309 | 101.563 |
|          |       |       | A(17-19-21) | 113.722 | 111.505 |
|          |       |       | A(17-41-40) | 109.589 | 109.12  |
|          |       |       | A(17-41-42) | 118.922 | 118.947 |
|          |       |       | A(20-19-21) | 107.111 | 110.937 |
|          |       |       | A(26-28-30) | 119.337 | 119.376 |
|          |       |       | A(28-30-31) | 120.35  | 119.924 |
|          |       |       | A(28-30-39) | 120.399 | 120.411 |
|          |       |       | A(31-30-39) | 119.25  | 119.664 |
|          |       |       | A(30-31-33) | 121.059 | 120.558 |
|          |       |       | A(30-39-37) | 118.532 | 118.463 |
|          |       |       | A(30-39-40) | 118.813 | 118.989 |
|          |       |       | A(31-33-35) | 119.736 | 119.958 |
|          |       |       | A(33-35-37) | 120.54  | 120.677 |
|          |       |       | A(35-37-38) | 120.427 | 119.645 |
|          |       |       | A(35-37-39) | 120.882 | 120.656 |
|          |       |       | A(37-39-40) | 122.649 | 122.54  |
|          |       |       | A(39-40-41) | 135.314 | 135.578 |
|          |       |       | A(40-41-42) | 131.489 | 131.925 |

<sup>a</sup>Atom numbering refer to **Fig. 1 (main text)**

**Table S2.** The calculated natural charges of **3<sup>a</sup>**.

| Atom |    | Charge  | Atom |    | Charge  | Atom |    | Charge  |
|------|----|---------|------|----|---------|------|----|---------|
| Cl   | 1  | -0.0116 | C    | 17 | -0.2659 | H    | 32 | 0.2386  |
| O    | 2  | -0.5501 | H    | 18 | 0.2848  | C    | 33 | -0.2110 |
| O    | 3  | -0.5817 | C    | 19 | -0.1311 | H    | 34 | 0.2420  |
| O    | 4  | -0.5606 | H    | 20 | 0.2817  | C    | 35 | -0.2435 |
| O    | 5  | -0.6441 | C    | 21 | 0.8257  | H    | 36 | 0.2439  |
| N    | 6  | -0.3782 | C    | 22 | -0.3350 | C    | 37 | -0.1877 |
| C    | 7  | -0.2191 | H    | 23 | 0.2279  | H    | 38 | 0.2835  |
| H    | 8  | 0.2531  | H    | 24 | 0.2301  | C    | 39 | -0.0850 |
| C    | 9  | -0.2445 | H    | 25 | 0.2252  | C    | 40 | 0.2655  |
| H    | 10 | 0.2566  | C    | 26 | 0.0261  | C    | 41 | -0.2553 |
| C    | 11 | -0.0454 | H    | 27 | 0.2443  | C    | 42 | 0.7894  |
| C    | 12 | -0.2468 | C    | 28 | -0.2927 | C    | 43 | -0.3292 |
| H    | 13 | 0.2554  | H    | 29 | 0.2498  | H    | 44 | 0.2188  |
| C    | 14 | -0.2187 | C    | 30 | -0.0281 | H    | 45 | 0.2203  |

|   |    |         |   |    |         |   |    |        |
|---|----|---------|---|----|---------|---|----|--------|
| H | 15 | 0.2445  | C | 31 | -0.2294 | H | 46 | 0.2210 |
| C | 16 | -0.0336 |   |    |         |   |    |        |

<sup>a</sup>Atom numbering refer to **Fig. 1(main text)**

**Table S3.** The calculated chemical shifts of **3<sup>a</sup>**.

| Atom | Calc    | Exp.   | Atom | Calc   | Exp.  |
|------|---------|--------|------|--------|-------|
| C 7  | 114.704 | 126.16 | H 8  | 7.625  | 7.567 |
| C 9  | 116.527 | 128.29 | H 10 | 7.468  | 7.166 |
| C 11 | 128.952 | 136.13 | H 13 | 7.594  | 7.166 |
| C 12 | 116.349 | 126.68 | H 15 | 7.783  | 7.567 |
| C 14 | 116.903 | 128.99 | H 18 | 4.709  | 4.563 |
| C 16 | 133.897 | 143.31 | H 20 | 4.231  | 4.422 |
| C 17 | 46.509  | 50.73  | H 23 | 4.183  | 3.830 |
| C 19 | 65.454  | 53.30  | H 24 | 4.067  | 3.830 |
| C 21 | 158.992 | 170.72 | H 25 | 4.161  | 3.830 |
| C 22 | 45.158  | 50.53  | H 27 | 6.926  | 6.698 |
| C 26 | 119.934 | 131.46 | H 29 | 6.469  | 6.284 |
| C 28 | 97.401  | 71.24  | H 32 | 7.610  | 7.728 |
| C 30 | 125.092 | 132.20 | H 34 | 7.947  | 9.356 |
| C 31 | 113.677 | 123.76 | H 36 | 7.790  | 8.590 |
| C 33 | 119.886 | 129.61 | H 38 | 11.291 | 9.857 |
| C 35 | 113.440 | 107.82 | H 44 | 3.867  | 3.526 |
| C 37 | 121.496 | 132.82 | H 45 | 3.688  | 3.526 |
| C 39 | 113.132 | 128.99 | H 46 | 3.419  | 3.526 |
| C 40 | 141.698 | 151.71 |      |        |       |
| C 41 | 86.573  | 95.40  |      |        |       |
| C 42 | 150.796 | 166.06 |      |        |       |
| C 43 | 42.543  | 50.53  |      |        |       |

<sup>a</sup>Atom numbering refer to **Fig. 1(main text)**
